# Supplementary material
Source: PubMed Central journal article supplement (PMC10280126)
Supplement: NIHMS1907523-supplement-1.pdf [file NIHMS1907523-supplement-1.pdf]

**Table S1: Estimated association (adjusted coefficient and stand error) between ownership of a pet over five years/1-5 years vs. no pets (exposure) and cognitive test score (outcome) for the total study population from the linear mixed model with a random intercept for each individual and a random slope for each pet ownership group, sensitivity analysis**

| Cognitive test            | Total (n=1,369)                                       |         |
|---------------------------|-------------------------------------------------------|---------|
|                           | Adjusted coefficient <sup>a</sup><br>(standard error) | P-value |
| Composite cognitive score |                                                       |         |
| 0 year                    | Reference                                             |         |
| 1-5 years                 | -0.008 (0.3)                                          | 0.97    |
| >5 years                  | 0.03 (0.3)                                            | 0.92    |
| Immediate word recall     |                                                       |         |
| 0 year                    | Reference                                             |         |
| 1-5 years                 | 0.10 (0.1)                                            | 0.40    |
| >5 years                  | -0.05 (0.1)                                           | 0.65    |
| Delayed word recall       |                                                       |         |
| 0 year                    | Reference                                             |         |
| 1-5 years                 | 0.02 (0.2)                                            | 0.92    |
| >5 years                  | 0.03 (0.1)                                            | 0.83    |
| Serial 7's task           |                                                       |         |
| 0 year                    | Reference                                             |         |
| 1-5 years                 | -0.09 (0.1)                                           | 0.44    |
| >5 years                  | 0.07 (0.1)                                            | 0.46    |
| Backward count            |                                                       |         |
| 0 year                    | Reference                                             |         |
| 1-5 years                 | -0.03 (0.03)                                          | 0.27    |
| >5 years                  | -0.03 (0.02)                                          | 0.21    |

<sup>a</sup>Adjusted for age, gender, education level, marital status, race/ethnicity, family income, survey year, depression, BML, hypertension, diabetes.

\*Accounted for strata and 2010 survey weights (household-level and respondent-level weights)

**Table S2: Estimated association (adjusted coefficient and stand error) between ownership of a pet over five years/1-5 years vs. no pets (exposure) and cognitive test score (outcome) for the total study population from the linear mixed model with a random intercept for each individual and a random slope for each pet ownership group, sensitivity analysis**

| Cognitive test            | Total (n=1,369)                                       |         |
|---------------------------|-------------------------------------------------------|---------|
|                           | Adjusted coefficient <sup>a</sup><br>(standard error) | P-value |
| Composite cognitive score |                                                       |         |
| 0 year                    | Reference                                             |         |
| 1-5 years                 | -0.08 (0.3)                                           | 0.76    |
| >5 years                  | 0.03 (0.2)                                            | 0.87    |
| Immediate word recall     |                                                       |         |
| 0 year                    | Reference                                             |         |
| 1-5 years                 | 0.1 (0.1)                                             | 0.31    |
| >5 years                  | 0.01 (0.08)                                           | 0.87    |
| Delayed word recall       |                                                       |         |
| 0 year                    | Reference                                             |         |
| 1-5 years                 | 0.04 (0.1)                                            | 0.76    |
| >5 years                  | 0.06 (0.1)                                            | 0.55    |
| Serial 7's task           |                                                       |         |
| 0 year                    | Reference                                             |         |
| 1-5 years                 | -0.2 (0.1)                                            | 0.04    |
| >5 years                  | -0.03 (0.08)                                          | 0.68    |
| Backward count            |                                                       |         |
| 0 year                    | Reference                                             |         |
| 1-5 years                 | 0.003 (0.02)                                          | 0.91    |
| >5 years                  | -0.01 (0.02)                                          | 0.57    |

\*Sensitivity analysis: those who had pets less than a year were categorized as non-pet owners (n=38). N for new categories: 745, 234, 387.

\*Adjusted for age, gender, education level, marital status, race/ethnicity, family income, survey year, depression.

\*Accounted for strata and 2010 survey weights (household-level and respondent-level weights)

**Table S3: Estimated association (adjusted coefficient and stand error) between ownership of a pet over five years/1-5 years vs. no pets (exposure) and cognitive test score (outcome) for the total study population from the linear mixed model with a random intercept for each individual and a random slope for each pet ownership group, sensitivity analysis, 2010-2020**

| Cognitive test            | Total (n=969)                                         |         |
|---------------------------|-------------------------------------------------------|---------|
|                           | Adjusted coefficient <sup>a</sup><br>(standard error) | P-value |
| Composite cognitive score |                                                       |         |
| 0 year                    | Reference                                             |         |
| 1-5 years                 | -0.10 (0.2)                                           | 0.53    |
| >5 years                  | 0.03 (0.2)                                            | 0.89    |
| Immediate word recall     |                                                       |         |
| 0 year                    | Reference                                             |         |
| 1-5 years                 | 0.07 (0.1)                                            | 0.46    |
| >5 years                  | 0.03 (0.1)                                            | 0.72    |
| Delayed word recall       |                                                       |         |
| 0 year                    | Reference                                             |         |
| 1-5 years                 | 0.01 (0.1)                                            | 0.94    |
| >5 years                  | 0.04 (0.1)                                            | 0.66    |
| Serial 7's task           |                                                       |         |
| 0 year                    | Reference                                             |         |
| 1-5 years                 | -0.20 (0.1)                                           | 0.02    |
| >5 years                  | -0.02 (0.1)                                           | 0.79    |
| Backward count            |                                                       |         |
| 0 year                    | Reference                                             |         |
| 1-5 years                 | -0.003 (0.02)                                         | 0.83    |
| >5 years                  | -0.002 (0.01)                                         | 0.92    |

<sup>a</sup>Adjusted for age, gender, education level, marital status, race/ethnicity, family income, survey year, depression.

\*Accounted for strata and 2010 survey weights (household-level and respondent-level weights)

**Table S4: Estimated association (adjusted coefficient and stand error) between ownership of a pet over five years/1-5 years vs. no pets (exposure) and cognitive test score (outcome) for the total study population from the linear mixed model with a random intercept for each individual and a random slope for each pet ownership group, complete table**

| Cognitive test            | Total (n=1,369)                                       |         | Age<65 (n=725)                                     |         | Age≥65 (n=644)                                     |         |
|---------------------------|-------------------------------------------------------|---------|----------------------------------------------------|---------|----------------------------------------------------|---------|
|                           | Adjusted coefficient <sup>a</sup><br>(standard error) | P-value | Adjusted coefficient <sup>b</sup><br>(stand error) | P-value | Adjusted coefficient <sup>b</sup><br>(stand error) | P-value |
| Composite cognitive score |                                                       |         |                                                    |         |                                                    |         |
| 0 year                    | Reference                                             |         | Reference                                          |         | Reference                                          |         |
| 1-5 years                 | -0.11 (0.2)                                           | 0.64    | -0.29 (0.4)                                        | 0.50    | 0.14 (0.3)                                         | 0.68    |
| >5 years                  | 0.02 (0.2)                                            | 0.94    | -0.41 (0.3)                                        | 0.16    | 0.76 (0.3)                                         | 0.03    |
| Age                       |                                                       |         |                                                    |         |                                                    |         |
| <65                       | Reference                                             |         |                                                    |         |                                                    |         |
| ≥65                       | -2.0 (0.2)                                            | <0.0001 | -                                                  | -       | -                                                  | -       |
| Race                      |                                                       |         |                                                    |         |                                                    |         |
| White                     | Reference                                             |         | Reference                                          |         | Reference                                          |         |
| Black                     | -1.36 (0.3)                                           | <0.0001 | -1.81 (0.3)                                        | <0.0001 | -0.62 (0.4)                                        | 0.13    |
| Hispanic                  | -0.69 (0.6)                                           | 0.26    | -1.04 (0.8)                                        | 0.20    | -0.30 (0.8)                                        | 0.72    |
| Other                     | -0.93 (0.7)                                           | 0.16    | -0.56 (1.0)                                        | 0.58    | -1.37 (0.8)                                        | 0.09    |
| Gender                    |                                                       |         |                                                    |         |                                                    |         |
| Women                     | Reference                                             |         | Reference                                          |         | Reference                                          |         |
| Men                       | -0.82 (0.2)                                           | <0.0001 | -0.81 (0.3)                                        | <0.0001 | -0.75 (0.3)                                        | 0.007   |
| Education level           |                                                       |         |                                                    |         |                                                    |         |
| Above college             | Reference                                             |         | Reference                                          |         | Reference                                          |         |
| College                   | -1.08 (0.3)                                           | 0.0003  | -0.99 (0.6)                                        | 0.55    | -1.48 (0.5)                                        | 0.005   |
| Below college             | -2.53 (0.3)                                           | <0.0001 | -2.56 (0.8)                                        | 0.16    | -2.52 (0.5)                                        | <0.0001 |
| Marital status            |                                                       |         |                                                    |         |                                                    |         |
| Married                   | Reference                                             |         | Reference                                          |         | Reference                                          |         |
| Unmarried                 | -0.29 (0.2)                                           | 0.16    | -0.28 (0.3)                                        | 0.20    | -0.27 (0.3)                                        | 0.33    |
| Family income             |                                                       |         |                                                    |         |                                                    |         |
| <15,900                   | Reference                                             |         | Reference                                          |         | Reference                                          |         |
| ≥15,900                   | 0.41(0.2)                                             | 0.06    | 0.11 (0.3)                                         | 0.80    | 0.96 (0.4)                                         | 0.008   |
| Depression                |                                                       |         |                                                    |         |                                                    |         |
| No                        | Reference                                             |         | Reference                                          |         | Reference                                          |         |
| Yes                       | -0.61 (0.2)                                           | 0.02    | -0.67 (0.3)                                        | 0.03    | -0.50 (0.4)                                        | 0.24    |
| Survey year               | -0.07(0.2)                                            | 0.15    | 0.08 (0.4)                                         | 0.60    | -0.30<br>(0.06)                                    | <0.0001 |

\* Accounted for strata and 2010 survey weights (household-level and respondent-level weights)

<sup>a</sup>Adjusted for age, gender, education level, marital status, race/ethnicity, family income, survey year, depression.

<sup>b</sup>Adjusted for gender, education level, marital status, race/ethnicity, family income, survey year, depression.
